# Supplementary material for: Investigating the effects of Liushen Capsules (LS) on the metabolome of seasonal influenza: A randomized clinical trial
Source: Front Pharmacol. 2022 Aug 11;13:968182. doi: 10.3389/fphar.2022.968182 (PMC9402892; doi:10.3389/fphar.2022.968182)
Supplement: Supplementary file 4 [file Table4.xlsx]

## Sheet: sheet1
Supplement table S5 The correlation between inflammatory factors and differential metabolites
TRAIL	P-value	PCC	|PCC|	IL-6	P-value	PCC	|PCC|	IL-1ra	P-value	PCC	|PCC|	IFN-γ	P-value	PCC	|PCC|	IL-13	P-value	PCC	|PCC|	IL-7	P-value	PCC	|PCC|	SCF	P-value	PCC	|PCC|	Eotaxin	P-value	PCC	|PCC|
PC(16:0/0:0)[rac]	0.00673967	-0.521174	0.521174	PC(16:0/0:0)[rac]	0.00027116	-0.670452	0.670452	PC(16:0/0:0)[rac]	0.00177939	-0.590844	0.590844	PC(16:0/0:0)[rac]	0.0313393	-0.420556	0.420556	LysoPC(18:2(9Z,12Z))	0.040926	-0.4003	0.4003	PC(20:4(5Z,8Z,11Z,14Z)/0:0)	0.0124585	-0.483967	0.483967	PC(20:4(5Z,8Z,11Z,14Z)/0:0)	0.0349058	-0.412371	0.412371	PC(20:4(5Z,8Z,11Z,14Z)/0:0)	0.0225791	-0.44417	0.44417
LysoPC(18:2(9Z,12Z))	0.0163507	-0.466267	0.466267	LysoPC(18:2(9Z,12Z))	0.000473106	-0.648703	0.648703	LysoPC(18:2(9Z,12Z))	0.00320629	-0.561838	0.561838	LysoPC(18:2(9Z,12Z))	0.028303	-0.428205	0.428205	PC(20:4(5Z,8Z,11Z,14Z)/0:0)	0.0122436	-0.485075	0.485075	LysoPE(0:0/20:4(8Z,11Z,14Z,17Z))	0.0147412	-0.473036	0.473036	PC(20:4(8Z,11Z,14Z,17Z)/0:0)	0.0327904	-0.417107	0.417107	LysoPE(0:0/20:4(8Z,11Z,14Z,17Z))	0.0380007	-0.405959	0.405959
PC(0:0/18:0)	0.0288322	-0.426863	0.426863	PC(0:0/18:0)	0.00184047	-0.589344	0.589344	PC(0:0/18:0)	0.0117369	-0.487659	0.487659	SM(d16:1/18:0)	0.0178484	0.460375	0.460375	LysoPE(0:0/20:4(8Z,11Z,14Z,17Z))	0.00933722	-0.501675	0.501675	PC(20:4(8Z,11Z,14Z,17Z)/0:0)	0.0117105	-0.487831	0.487831	LysoPE(22:6(4Z,7Z,10Z,13Z,16Z,19Z)/0:0)	0.0311784	-0.420981	0.420981	PC(20:4(8Z,11Z,14Z,17Z)/0:0)	0.0290408	-0.426341	0.426341
SM(d16:1/18:0)	0.0028294	0.568236	0.568236	SM(d16:1/18:0)	0.0145101	0.474034	0.474034	SM(d16:1/18:0)	0.00650622	0.523256	0.523256	LysoPC(18:1(11Z))	0.0181446	-0.45925	0.45925	LysoPE(18:2(9Z,12Z)/0:0)	0.0198028	-0.453376	0.453376	LysoPE(22:6(4Z,7Z,10Z,13Z,16Z,19Z)/0:0)	0.0226037	-0.444086	0.444086	PE(0:0/20:4(5Z,8Z,11Z,14Z))	0.0407183	-0.400692	0.400692	PE(16:0/0:0)	0.0334708	-0.415486	0.415486
LysoPC(18:1(11Z))	0.0105893	-0.493939	0.493939	LysoPC(18:1(11Z))	0.000186993	-0.684238	0.684238	LysoPC(18:1(11Z))	0.00111298	-0.612719	0.612719	LysoPC(16:0)	0.0224055	-0.444665	0.444665	cis-p-Coumaric acid	0.0338106	-0.414736	0.414736	PE(0:0/20:4(5Z,8Z,11Z,14Z))	0.0160918	-0.467426	0.467426	LysoPE(18:0/0:0)	0.00683444	-0.520288	0.520288	Cortolone-3-glucuronide	0.00958031	0.500098	0.500098
LysoPC(16:0)	0.00657062	-0.522641	0.522641	LysoPC(16:0)	0.00021343	-0.679582	0.679582	LysoPC(16:0)	0.00115094	-0.611216	0.611216	1-(2-methoxy-6Z-octadecenyl)-sn-glycero-3-phosphoethanolamine	0.0371479	-0.407731	0.407731	PC(20:4(8Z,11Z,14Z,17Z)/0:0)	0.00892508	-0.504427	0.504427	LysoPE(18:0/0:0)	0.0194508	-0.454642	0.454642	PE(16:0/0:0)	0.00248419	-0.574629	0.574629	1-(2-methoxy-6Z-pentadecenyl)-sn-glycero-3-phosphoethanolamine	0.0316791	-0.419701	0.419701
1-(2-methoxy-6Z-octadecenyl)-sn-glycero-3-phosphoethanolamine	0.00821815	-0.50952	0.50952	1-(2-methoxy-6Z-octadecenyl)-sn-glycero-3-phosphoethanolamine	0.000390824	-0.656392	0.656392	1-(2-methoxy-6Z-octadecenyl)-sn-glycero-3-phosphoethanolamine	0.00336883	-0.559307	0.559307	PC(20:4(5Z,8Z,11Z,14Z)/0:0)	0.00347104	-0.557708	0.557708	PE(0:0/20:4(5Z,8Z,11Z,14Z))	0.00598665	-0.527853	0.527853	PE(16:0/0:0)	0.00792521	-0.511717	0.511717	L-Methionine S-oxide	0.0288837	-0.426729	0.426729	Amoritin	0.0257492	-0.434712	0.434712
PC(20:4(5Z,8Z,11Z,14Z)/0:0)	0.00280568	-0.568712	0.568712	PC(20:4(5Z,8Z,11Z,14Z)/0:0)	0.000180847	-0.685511	0.685511	PC(20:4(5Z,8Z,11Z,14Z)/0:0)	0.000370502	-0.658562	0.658562	LysoPE(0:0/20:4(8Z,11Z,14Z,17Z))	0.00399627	-0.55017	0.55017	LysoPE(18:0/0:0)	0.0268831	-0.431768	0.431768	L-Methionine S-oxide	0.0325111	-0.417748	0.417748	1-(2-methoxy-6Z-pentadecenyl)-sn-glycero-3-phosphoethanolamine	0.00354247	-0.556673	0.556673	Sphinganine 1-phosphate	0.0146635	0.473385	0.473385
SM(d16:1/16:0)	0.030958	-0.421539	0.421539	SM(d16:1/16:0)	0.00622599	-0.52574	0.52574	SM(d16:1/16:0)	0.0243473	-0.438665	0.438665	LysoPE(18:2(9Z,12Z)/0:0)	0.0279729	-0.429016	0.429016	L-Arginine	0.0358284	-0.410457	0.410457	Cortolone-3-glucuronide	0.030002	0.423882	0.423882	PE(0:0/18:0)	0.0109777	-0.491772	0.491772	Oxoglutaric acid	0.00603841	0.527382	0.527382
PC(18:0/0:0)	0.0199297	-0.452956	0.452956	PC(18:0/0:0)	0.00198176	-0.585783	0.585783	PC(18:0/0:0)	0.00850546	-0.507427	0.507427	PE(19:0/0:0)	0.0283898	-0.427989	0.427989	PE(16:0/0:0)	0.0250188	-0.436794	0.436794	1-(2-methoxy-6Z-pentadecenyl)-sn-glycero-3-phosphoethanolamine	0.0044248	-0.544707	0.544707	LysoPE(0:0/16:0)	0.0025571	-0.573263	0.573263	11-Hydroxyprogesterone 11-glucuronide	0.00880233	0.505278	0.505278
LysoPE(0:0/20:4(8Z,11Z,14Z,17Z))	0.000965602	-0.61896	0.61896	LysoPE(0:0/20:4(8Z,11Z,14Z,17Z))	9.22315e-05	-0.709576	0.709576	LysoPE(0:0/20:4(8Z,11Z,14Z,17Z))	0.000348453	-0.660845	0.660845	L-Alloisoleucine	0.0234735	-0.441381	0.441381	L-Lysine	0.0375665	-0.40691	0.40691	PE(0:0/18:0)	0.0238475	-0.440138	0.440138	Sphinganine 1-phosphate	0.013823	0.477243	0.477243	Cinereain	0.0322145	-0.41843	0.41843
LysoPE(18:2(9Z,12Z)/0:0)	0.0120585	-0.485963	0.485963	LysoPE(18:2(9Z,12Z)/0:0)	0.00125521	-0.607384	0.607384	LysoPE(18:2(9Z,12Z)/0:0)	0.00473062	-0.541142	0.541142	PC(20:4(8Z,11Z,14Z,17Z)/0:0)	0.008064	-0.510636	0.510636	L-Methionine S-oxide	0.00308285	-0.563861	0.563861	Amoritin	0.0124273	-0.484122	0.484122	Oxoglutaric acid	0.0258489	0.434449	0.434449
PE(19:0/0:0)	0.00520719	-0.535882	0.535882	PE(19:0/0:0)	0.000228208	-0.67713	0.67713	PE(19:0/0:0)	0.00165337	-0.594337	0.594337	LysoPE(22:6(4Z,7Z,10Z,13Z,16Z,19Z)/0:0)	0.00408243	-0.549054	0.549054	Cortolone-3-glucuronide	0.0129363	0.481664	0.481664	LysoPE(0:0/16:0)	0.00959313	-0.499995	0.499995	PC(13:0/0:0)	0.0043704	-0.545391	0.545391
PC(O-16:0/2:0)	0.0147412	-0.473034	0.473034	PC(O-16:0/2:0)	0.00417742	-0.547778	0.547778	PC(O-16:0/2:0)	0.0141497	-0.475676	0.475676	GM4(d18:1/16:0)	0.0205964	-0.450625	0.450625	1-(2-methoxy-6Z-pentadecenyl)-sn-glycero-3-phosphoethanolamine	0.0116139	-0.488401	0.488401	PS(O-20:0/0:0)	0.0245357	-0.438128	0.438128	PIM1(18:0/16:2(9Z,12Z))	0.0307188	-0.42212	0.42212
L-Alloisoleucine	0.0012942	-0.605955	0.605955	L-Alloisoleucine	0.0331573	-0.41624	0.41624	L-Alloisoleucine	0.00560029	-0.531794	0.531794	PE(0:0/20:4(5Z,8Z,11Z,14Z))	0.00389359	-0.551527	0.551527	D-Pipecolic acid	0.0368069	-0.408464	0.408464	Isoamoritin	0.0355692	-0.410987	0.410987	Cinereain	0.0300035	-0.423862	0.423862
cis-p-Coumaric acid	0.00290589	-0.566893	0.566893	cis-p-Coumaric acid	0.0297923	-0.424429	0.424429	cis-p-Coumaric acid	0.0171701	-0.462976	0.462976	Betaine	0.0216233	-0.447211	0.447211	3,4-dimethyl-5-carboxyethyl-2-furanpentanoic acid	0.0185027	0.457936	0.457936	Sphinganine 1-phosphate	0.00755482	0.514552	0.514552
PC(20:4(8Z,11Z,14Z,17Z)/0:0)	0.00372449	-0.553948	0.553948	Pregnanolone sulfate	0.00165161	0.594396	0.594396	Pregnanolone sulfate	0.0141222	0.475819	0.475819	LysoPE(18:0/0:0)	0.00190476	-0.587617	0.587617	Caffeic acid 3-O-glucuronide	0.0330236	-0.416597	0.416597	Oxoglutaric acid	0.00381852	0.552568	0.552568
LysoPE(22:6(4Z,7Z,10Z,13Z,16Z,19Z)/0:0)	0.0017383	-0.591907	0.591907	PC(20:4(8Z,11Z,14Z,17Z)/0:0)	0.00100822	-0.616993	0.616993	PC(20:4(8Z,11Z,14Z,17Z)/0:0)	0.00174459	-0.591681	0.591681	L-Arginine	0.0377029	-0.406599	0.406599	L-Histidine	0.0395524	-0.402971	0.402971	PC(13:0/0:0)	0.00803141	-0.510889	0.510889
GM4(d18:1/16:0)	0.00991255	-0.498049	0.498049	LysoPE(22:6(4Z,7Z,10Z,13Z,16Z,19Z)/0:0)	4.50153e-05	-0.732238	0.732238	LysoPE(22:6(4Z,7Z,10Z,13Z,16Z,19Z)/0:0)	0.00026667	-0.671088	0.671088	PE(16:0/0:0)	0.00118908	-0.60981	0.60981	PE(0:0/18:0)	0.0379568	-0.406057	0.406057	PIM1(18:0/16:2(9Z,12Z))	0.0280685	-0.428778	0.428778
Avocadene 1-acetate	0.0231639	-0.442294	0.442294	GM4(d18:1/16:0)	0.00233827	-0.577523	0.577523	GM4(d18:1/16:0)	0.00212407	-0.58228	0.58228	L-Lysine	0.0183052	-0.458625	0.458625	Amoritin	0.0200599	-0.452452	0.452452	11-Hydroxyprogesterone 11-glucuronide	0.0230469	0.44266	0.44266
PE(0:0/20:4(5Z,8Z,11Z,14Z))	0.000610141	-0.638423	0.638423	Avocadene 1-acetate	0.00443715	-0.544504	0.544504	Avocadene 1-acetate	0.0217063	-0.446892	0.446892	L-Methionine S-oxide	0.00305902	-0.564296	0.564296	(2-benzyl-3-oxobutoxy)sulfonic acid	0.0403944	-0.401358	0.401358	Cinereain	0.0235382	-0.441192	0.441192
Betaine	0.00614367	-0.526455	0.526455	PE(0:0/20:4(5Z,8Z,11Z,14Z))	0.000116059	-0.701488	0.701488	PE(0:0/20:4(5Z,8Z,11Z,14Z))	0.000399599	-0.655448	0.655448	PC(O-18:1(11Z)/0:0)	0.00594811	-0.528256	0.528256	LysoPE(0:0/16:0)	0.035102	-0.411921	0.411921
LysoPE(18:0/0:0)	0.000421227	-0.653411	0.653411	Betaine	0.0406648	-0.400838	0.400838	Betaine	0.00681211	-0.520482	0.520482	(5-hydroxy-7-methoxy-2,2-dimethyl-3,4-dihydro-2H-1-benzopyran-4-yl)oxidanesulfonic acid	0.0129683	-0.48151	0.48151	Benzofuran	0.00816868	-0.509878	0.509878
L-Arginine	0.00833707	-0.508604	0.508604	LysoPE(18:0/0:0)	2.72068e-05	-0.746138	0.746138	LysoPE(18:0/0:0)	5.60635e-05	-0.725597	0.725597	PC(20:2(11Z,14Z)/0:0)	0.0238316	-0.440206	0.440206	Homoferreirin	0.0371479	-0.407717	0.407717
PE(16:0/0:0)	0.001001	-0.617358	0.617358	L-Arginine	0.00147852	-0.59959	0.59959	L-Arginine	0.00802632	-0.510956	0.510956	Cortolone-3-glucuronide	0.0200799	0.452335	0.452335	PIM1(17:0/18:0)	0.031976	-0.419029	0.419029
L-Lysine	0.00100895	-0.616923	0.616923	PE(16:0/0:0)	3.28205e-05	-0.741017	0.741017	PE(16:0/0:0)	3.98436e-05	-0.735567	0.735567	1-(2-methoxy-6Z-pentadecenyl)-sn-glycero-3-phosphoethanolamine	0.00205059	-0.584016	0.584016	Isoamoritin	0.0277825	-0.429493	0.429493
L-Methionine S-oxide	0.000407224	-0.654787	0.654787	L-Lysine	0.00100895	-0.616916	0.616916	L-Lysine	0.00282868	-0.568263	0.568263	D-Pipecolic acid	0.0177452	-0.460779	0.460779	Sphinganine 1-phosphate	0.000154378	0.691344	0.691344
3-phenyloxirane-2-carboxylic acid	0.0319827	-0.418998	0.418998	L-Methionine S-oxide	0.00639236	-0.524318	0.524318	L-Methionine S-oxide	0.00231423	-0.578019	0.578019	LysoPC(20:1(11Z))	0.014506	-0.474095	0.474095	PE(20:5(5Z,8Z,11Z,14Z,17Z)/0:0)	0.0240231	-0.439593	0.439593
3-Methyl sulfolene	0.00797498	-0.511381	0.511381	3-Methyl sulfolene	0.019968	-0.452821	0.452821	3-Methyl sulfolene	0.0187971	-0.45691	0.45691	Caffeic acid 3-O-glucuronide	0.0110484	-0.491341	0.491341	Oxoglutaric acid	0.001404	0.602171	0.602171
PE(21:0/0:0)	0.0290982	-0.426178	0.426178	PE(21:0/0:0)	0.00472506	-0.541229	0.541229	PE(21:0/0:0)	0.0200507	-0.452523	0.452523	PC(14:0/20:3(5Z,8Z,11Z))	0.0115987	0.488518	0.488518	3-Methylcyclohexanethiol	0.03311	-0.416366	0.416366
PC(O-18:1(11Z)/0:0)	0.00751404	-0.51489	0.51489	PC(O-18:1(11Z)/0:0)	0.000861913	-0.623951	0.623951	PC(O-18:1(11Z)/0:0)	0.000443483	-0.651438	0.651438	OOB-PE	0.0341391	-0.413997	0.413997	Glutaminyllysine	0.0232986	-0.441898	0.441898
PE(0:0/18:2(9Z,12Z))	0.0237292	-0.440551	0.440551	PE(0:0/18:2(9Z,12Z))	0.00232974	-0.577708	0.577708	PE(0:0/18:2(9Z,12Z))	0.00782904	-0.5125	0.5125	L-Histidine	0.0218205	-0.446518	0.446518	PC(13:0/0:0)	0.0213074	-0.448149	0.448149
(5-hydroxy-7-methoxy-2,2-dimethyl-3,4-dihydro-2H-1-benzopyran-4-yl)oxidanesulfonic acid	0.00135032	-0.603951	0.603951	(5-hydroxy-7-methoxy-2,2-dimethyl-3,4-dihydro-2H-1-benzopyran-4-yl)oxidanesulfonic acid	0.00116199	-0.610792	0.610792	(5-hydroxy-7-methoxy-2,2-dimethyl-3,4-dihydro-2H-1-benzopyran-4-yl)oxidanesulfonic acid	0.00216165	-0.581396	0.581396	PE(0:0/18:0)	0.00235138	-0.577225	0.577225	PIM1(18:0/16:2(9Z,12Z))	0.00727243	-0.516763	0.516763
PC(20:2(11Z,14Z)/0:0)	0.0090443	-0.503622	0.503622	PC(20:2(11Z,14Z)/0:0)	0.00186733	-0.588647	0.588647	PC(20:2(11Z,14Z)/0:0)	0.00213579	-0.581989	0.581989	PC(O-18:0/0:0)	0.0116473	-0.488208	0.488208	11-Hydroxyprogesterone 11-glucuronide	0.0099448	0.497769	0.497769
Cortolone-3-glucuronide	0.00670018	0.521562	0.521562	Cortolone-3-glucuronide	1.79507e-05	0.756978	0.756978	Cortolone-3-glucuronide	0.000660218	0.635131	0.635131	(2-benzyl-3-oxobutoxy)sulfonic acid	0.0139146	-0.476772	0.476772	Cinereain	0.0316754	-0.419726	0.419726
1-(2-methoxy-6Z-pentadecenyl)-sn-glycero-3-phosphoethanolamine	0.000765266	-0.629058	0.629058	1-(2-methoxy-6Z-pentadecenyl)-sn-glycero-3-phosphoethanolamine	0.000138962	-0.694842	0.694842	1-(2-methoxy-6Z-pentadecenyl)-sn-glycero-3-phosphoethanolamine	0.000159499	-0.690187	0.690187	LysoPE(0:0/16:0)	0.00145589	-0.600404	0.600404
D-Pipecolic acid	0.000899095	-0.622071	0.622071	D-Pipecolic acid	0.00110722	-0.612946	0.612946	D-Pipecolic acid	0.00281488	-0.568506	0.568506	Homoferreirin	0.0172802	-0.462567	0.462567
LysoPC(20:1(11Z))	0.00342152	-0.558523	0.558523	LysoPC(20:1(11Z))	0.000579083	-0.640701	0.640701	LysoPC(20:1(11Z))	0.000911383	-0.621547	0.621547	PC(O-18:1(9Z)/0:0)	0.0118359	-0.48715	0.48715
3,5,7-Octatriyn-1-ol	0.00371256	-0.554124	0.554124	3,5,7-Octatriyn-1-ol	0.0408443	-0.400458	0.400458	3,5,7-Octatriyn-1-ol	0.0206826	-0.450303	0.450303	PIM1(17:0/18:0)	0.0356164	-0.410879	0.410879
Caffeic acid 3-O-glucuronide	0.000605387	-0.6388	0.6388	PA(8:0/13:0)	0.0297801	-0.424473	0.424473	PA(8:0/13:0)	0.03311	-0.416377	0.416377	PS(O-20:0/0:0)	0.00879657	-0.505328	0.505328
PC(14:0/20:3(5Z,8Z,11Z))	0.016169	0.467043	0.467043	Caffeic acid 3-O-glucuronide	0.000642506	-0.636274	0.636274	Caffeic acid 3-O-glucuronide	0.00160327	-0.595731	0.595731	13'-Hydroxy-alpha-tocopherol	0.0179775	0.459865	0.459865
OOB-PE	0.00891455	-0.504505	0.504505	OOB-PE	0.000108177	-0.703994	0.703994	PC(14:0/20:3(5Z,8Z,11Z))	0.0240646	0.439468	0.439468	Isoamoritin	0.0256795	-0.434902	0.434902
L-Histidine	0.00194119	-0.586704	0.586704	L-Histidine	0.00598665	-0.527845	0.527845	OOB-PE	0.00155418	-0.597169	0.597169	LysoPC(P-18:0)	0.016925	-0.464035	0.464035
PE(0:0/18:0)	0.00154025	-0.597633	0.597633	PE(0:0/18:0)	4.0864e-05	-0.734806	0.734806	L-Histidine	0.00274088	-0.569939	0.569939	PC(P-18:1(9Z)/0:0)	0.024782	-0.43743	0.43743
PG(20:3(8Z,11Z,14Z)/0:0)	0.0160865	-0.467463	0.467463	PG(20:3(8Z,11Z,14Z)/0:0)	0.000377796	-0.657835	0.657835	PE(0:0/18:0)	7.61404e-05	-0.715814	0.715814	Sphinganine 1-phosphate	0.0206326	0.450485	0.450485
Allodesmosine	0.0293803	-0.425478	0.425478	Allodesmosine	0.00933722	-0.501661	0.501661	PG(20:3(8Z,11Z,14Z)/0:0)	0.0134233	-0.479123	0.479123	PE(20:5(5Z,8Z,11Z,14Z,17Z)/0:0)	0.0360895	-0.409908	0.409908
PC(O-18:0/0:0)	0.0306405	-0.422306	0.422306	PC(O-18:0/0:0)	0.00204517	-0.584157	0.584157	PC(O-18:0/0:0)	0.00109546	-0.613426	0.613426	Oxoglutaric acid	0.000477384	0.648354	0.648354
Amoritin	0.0106481	-0.493576	0.493576	Amoritin	6.91656e-05	-0.718847	0.718847	Amoritin	0.0131682	-0.480378	0.480378	3-Methylcyclohexanethiol	0.0215511	-0.447434	0.447434
(2-benzyl-3-oxobutoxy)sulfonic acid	0.00134652	-0.604109	0.604109	(2-benzyl-3-oxobutoxy)sulfonic acid	0.000999228	-0.617439	0.617439	(2-benzyl-3-oxobutoxy)sulfonic acid	0.0017088	-0.592719	0.592719	Glutaminyllysine	0.0161362	-0.467201	0.467201
LysoPE(0:0/16:0)	0.00129184	-0.606053	0.606053	LysoPE(0:0/16:0)	6.91519e-05	-0.718918	0.718918	LysoPE(0:0/16:0)	6.13402e-05	-0.722718	0.722718	PC(13:0/0:0)	0.00250583	-0.574232	0.574232
Benzofuran	0.000728402	-0.631116	0.631116	Benzofuran	0.0337574	-0.41486	0.41486	Benzofuran	0.0234091	-0.441586	0.441586	PIM1(18:0/16:2(9Z,12Z))	0.0203062	-0.451605	0.451605
Homoferreirin	0.00865043	-0.506423	0.506423	Homoferreirin	0.000615375	-0.638027	0.638027	Homoferreirin	0.00287112	-0.567542	0.567542	Cinereain	0.0160787	-0.467523	0.467523
PC(O-18:1(9Z)/0:0)	0.0219761	-0.446013	0.446013	PC(O-18:1(9Z)/0:0)	0.000638217	-0.636542	0.636542	PC(O-18:1(9Z)/0:0)	0.000875668	-0.62324	0.62324
PIM1(17:0/18:0)	0.0203062	-0.451616	0.451616	PIM1(17:0/18:0)	0.00401836	-0.549871	0.549871	PIM1(17:0/18:0)	0.00991255	-0.498034	0.498034
PS(O-20:0/0:0)	0.0116991	-0.4879	0.4879	PS(O-20:0/0:0)	0.000750052	-0.629936	0.629936	PS(O-20:0/0:0)	0.00132733	-0.604808	0.604808
xi-2,3-Octadiene-5,7-diyn-1-ol	0.03311	-0.416353	0.416353	13'-Hydroxy-alpha-tocopherol	0.0311784	0.420966	0.420966	13'-Hydroxy-alpha-tocopherol	0.00856331	0.507044	0.507044
13'-Hydroxy-alpha-tocopherol	0.00381335	0.552677	0.552677	L-Threonine	0.0293803	-0.425461	0.425461	Isoamoritin	0.00163206	-0.594965	0.594965
L-Threonine	0.0182999	-0.458676	0.458676	Isoamoritin	0.000100756	-0.706491	0.706491	LysoPC(P-18:0)	0.00299552	-0.565353	0.565353
Isoamoritin	0.0048627	-0.539627	0.539627	LysoPC(P-18:0)	0.00453199	-0.543429	0.543429	PC(P-18:1(9Z)/0:0)	0.00181252	-0.590023	0.590023
LysoPC(P-18:0)	0.0133713	-0.479357	0.479357	PC(P-18:1(9Z)/0:0)	0.000942301	-0.620051	0.620051	Sphinganine 1-phosphate	0.00870156	0.506085	0.506085
PC(P-18:1(9Z)/0:0)	0.0193936	-0.454835	0.454835	Sphinganine 1-phosphate	0.000326414	0.663327	0.663327	PE(20:5(5Z,8Z,11Z,14Z,17Z)/0:0)	0.00569701	-0.530712	0.530712
Sphinganine 1-phosphate	8.52534e-05	0.712091	0.712091	PE(20:5(5Z,8Z,11Z,14Z,17Z)/0:0)	0.00102331	-0.616312	0.616312	N(tele)-methylhistaminium	0.0160604	-0.467638	0.467638
PE(20:5(5Z,8Z,11Z,14Z,17Z)/0:0)	0.0134649	-0.478933	0.478933	N(tele)-methylhistaminium	0.00232082	-0.577884	0.577884	Oxoglutaric acid	8.26931e-05	0.713148	0.713148
N(tele)-methylhistaminium	0.00984383	-0.498468	0.498468	Oxoglutaric acid	9.17721e-06	0.772914	0.772914	3-Methylcyclohexanethiol	0.00336441	-0.559381	0.559381
Oxoglutaric acid	0.00022633	0.677432	0.677432	3-Methylcyclohexanethiol	0.000837537	-0.625176	0.625176	Glutaminyllysine	0.00442848	-0.544627	0.544627
3-Methylcyclohexanethiol	0.00100718	-0.617047	0.617047	Glutaminylaspartic acid	0.0285142	-0.427636	0.427636	PC(13:0/0:0)	0.000125816	-0.698625	0.698625
Glutaminylaspartic acid	0.0168312	-0.46441	0.46441	Glutaminyllysine	0.00155865	-0.597004	0.597004	PIM1(18:0/16:2(9Z,12Z))	0.00677388	-0.520859	0.520859
Glutaminyllysine	0.00444507	-0.544374	0.544374	PC(13:0/0:0)	0.000116059	-0.701446	0.701446	11-Hydroxyprogesterone 11-glucuronide	0.00329093	0.560468	0.560468
PC(13:0/0:0)	0.000793484	-0.627609	0.627609	Cardanoldiene	0.00650593	0.523274	0.523274	Cinereain	0.000755154	-0.629647	0.629647
PIM1(18:0/16:2(9Z,12Z))	0.00298111	-0.565578	0.565578	PIM1(18:0/16:2(9Z,12Z))	0.00211744	-0.582441	0.582441
11-Hydroxyprogesterone 11-glucuronide	0.0105914	0.493907	0.493907	11-Hydroxyprogesterone 11-glucuronide	0.000107236	0.704381	0.704381
Cinereain	0.00473188	-0.541114	0.541114	Cinereain	4.75146e-05	-0.730426	0.730426
